# Supplementary material for: Insight from Wild Yeast Isolates into the Molecular Mechanisms of Lifespan Variation Mediated by Caloric Restriction
Source: PubMed Central journal article supplement — bioRxiv. 2024 Mar 17:2024.03.17.585422. Preprint. [Version 1] doi: 10.1101/2024.03.17.585422 (PMC10979966; doi:10.1101/2024.03.17.585422), 2024-03-17
Supplement: NIHPP2024.03.17.585422v1-supplement-1.pdf [file NIHPP2024.03.17.585422v1-supplement-1.pdf]

## Supplementary Figures

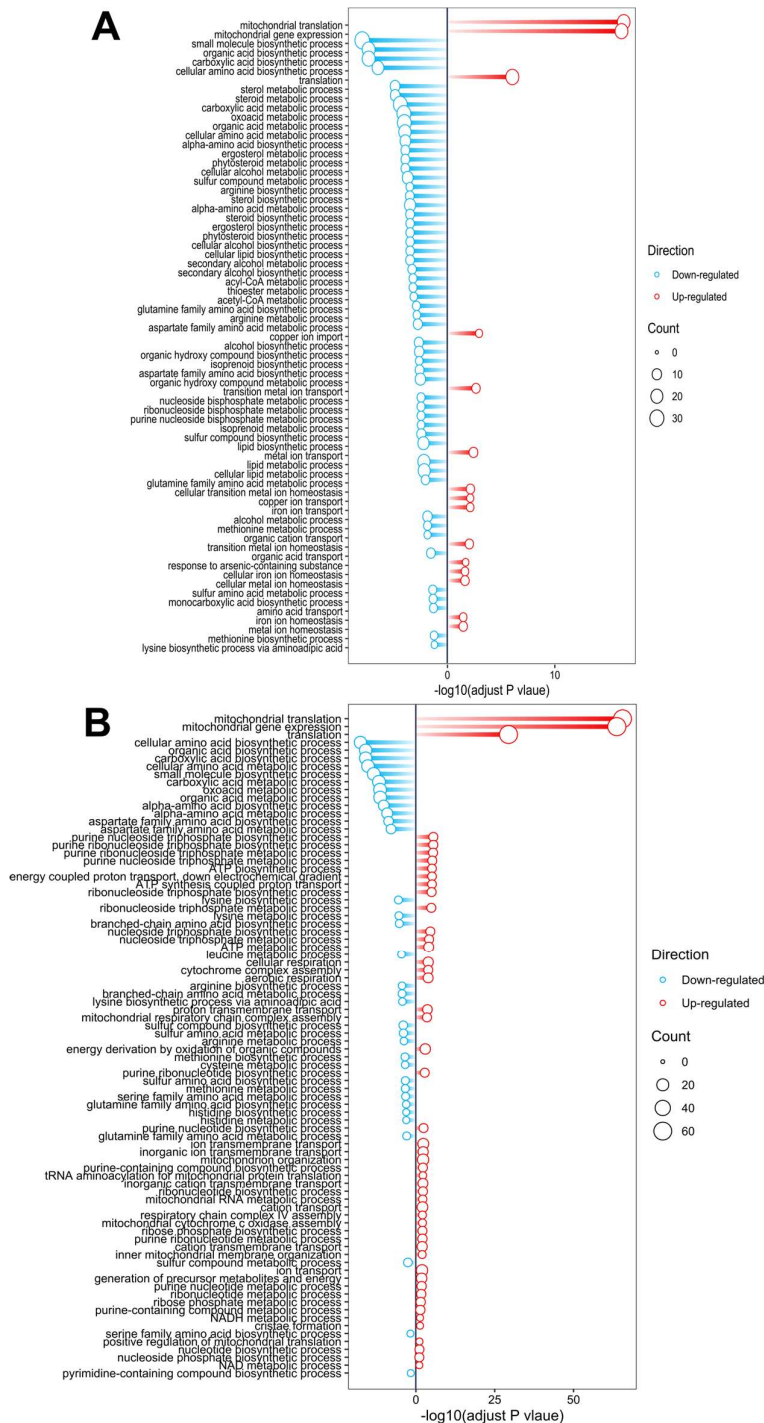

**Figure S1: GO term enrichment analyses:** The GO term (Molecular Function) analyses show significantly enriched terms for (A) positively responding versus non-responding and (B) positively responding versus negatively responding strains.

| <b>A</b> |      | <b>B</b> |      |
|----------|------|----------|------|
| MET32    | 91.9 | SFP1     | 83.2 |
| MSN2     | 36.6 | CST6     | 39.2 |
| MSN4     | 12.8 | GCR1     | 34.9 |
| AFT1     | 9.9  | HSF1     | 26   |
| HCM1     | 7.1  | RAP1     | 23.2 |
| GCN5     | 5.9  | SPT20    | 22   |
| MED2     | 5.6  | FHL1     | 12.8 |
| HAP4     | 5.4  | FKH2     | 12.5 |
| AFT2     | 4.9  | HF11     | 4.9  |
| MET4     | 3.9  | SPT10    | 4.5  |
| RIM101   | 3.8  | REB1     | 3.3  |
| ZAP1     | 2.7  | URE2     | 2.1  |
| XBP1     | 2.6  | PIP2     | 2.1  |

Up-regulated                      Down-regulated

**Figure S2. Transcription factor enrichment analyses for non-responding strains analyzed under CR condition.** Significantly enriched TFs for (A) up- and (B) down-regulated DEGs obtained under CR conditions for non-responding strains. The color index and the number show the significance of the enrichment score ( $-\log_{10}$ , adjusted  $P$ -value).

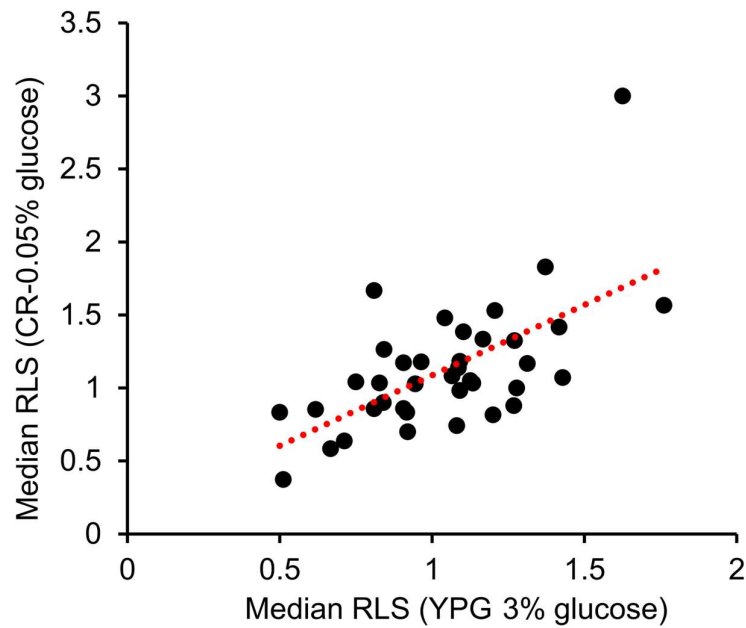

**Figure S3. A positive correlation of median RLS phenotype between YPG and CR medium was observed.** A significant correlation was observed between median RLS in YPG and median RLS in CR, wherein glycerol-induced CR-induced respiration approximately equally extends the RLS of those strains we tested ( $R^2 = 0.62$ , Padj value =  $2.29 \times 10^{-4}$ ).
